# Supplementary material
Source: HighWire-hosted journal article supplement (https://bibliotheek.ehb.be/content/suppl/2015/05/19/openhrt-2014-000234)
Supplement: openhrt-2014-000234supp.pdf [file openhrt-2014-000234supp.pdf]

Supplementary Table i: Studies of observer variability using a cut off of >50% stenosis.

| Study     | N   | Scanner    | Age (years) | Male (%) | Population risk                                                      | Identified CAD                                        | Inter-observer (% agreement, Kappa) |            |             | Intra-observer (% agreement, Kappa) |            |             |
|-----------|-----|------------|-------------|----------|----------------------------------------------------------------------|-------------------------------------------------------|-------------------------------------|------------|-------------|-------------------------------------|------------|-------------|
|           |     |            |             |          |                                                                      |                                                       | Per patient                         | Per vessel | Per segment | Per patient                         | Per vessel | Per segment |
| Nicol     | 133 | 64         | 61 ± 13     | 30       | 39% low to intermediate, 39% intermediate to high, 22% very low risk | 41% normal, 26% minor, 32% moderate, 15% severe       | 81%                                 | 94%        | 97%         | 87%                                 | 94%        | 96%         |
| Pelliccia | 118 | 320        | 61 ± 10     | 75       | *                                                                    | 44% normal, 20% one, 25% two, 9% three vessel disease | 96%, 0.91                           | 0.91       | 0.89        | *                                   | *          | *           |
| Overhus   | 209 | 64 or DSCT | 61 ± 6.9    | 56       | 13.4% low, 87.2% intermediate or high                                | 35% of patients had any disease                       | 82%, 0.65                           | *          | *           | *                                   | *          | *           |
| Stolzman  | 100 | DSCT       | 56 ± 13     | 61       | *                                                                    | 55% of segments had >50% stenosis                     | 0.77                                | *          | *           | *                                   | *          | *           |
| Meijboom  | 360 | 64         | 60 ± 6      | 68       | Intermediate to high                                                 | 68% had obstructive CAD                               | 0.66                                | *          | *           | 0.69                                | *          | *           |

(CAD, coronary artery disease; \*, not given)
